# Supplementary material
Source: MDPI journal article supplement (https://www.mdpi.com/2073-4441/14/14/2231)
Supplement: s1 [file s1]

## SUPPLEMENTARY MATERIAL

### Section S1. Synthetic acid drainage solutions composition

| Ion (g/L)                     | 100 mgFe/L | 100 mgAl/L | 100 mgFe/L +<br>100 mgAl/L | 50 mgFe/L | 50 mgAl/L | 50 mgFe/L +<br>50 mgAl/L |
|-------------------------------|------------|------------|----------------------------|-----------|-----------|--------------------------|
| Al <sup>3+</sup>              | -          | 0.10       | 0.10                       | -         | 0.05      | 0.05                     |
| Fe <sup>3+</sup>              | 0.10       | -          | 0.10                       | 0.05      | -         | 0.05                     |
| Na <sup>+</sup>               | 1.5        | 1.5        | 1.5                        | 1.0       | 1.0       | 1.0                      |
| Cl <sup>-</sup>               | 2.5        | 2.3        | 2.5                        | 1.6       | 1.5       | 1.6                      |
| SO <sub>4</sub> <sup>2-</sup> | 2.4        | 2.4        | 2.4                        | 2.4       | 2.4       | 2.4                      |

### Section S2. Photographs of settling experiments

Solution 1: Fe = 100 mg L<sup>-1</sup>. pH = 5.5

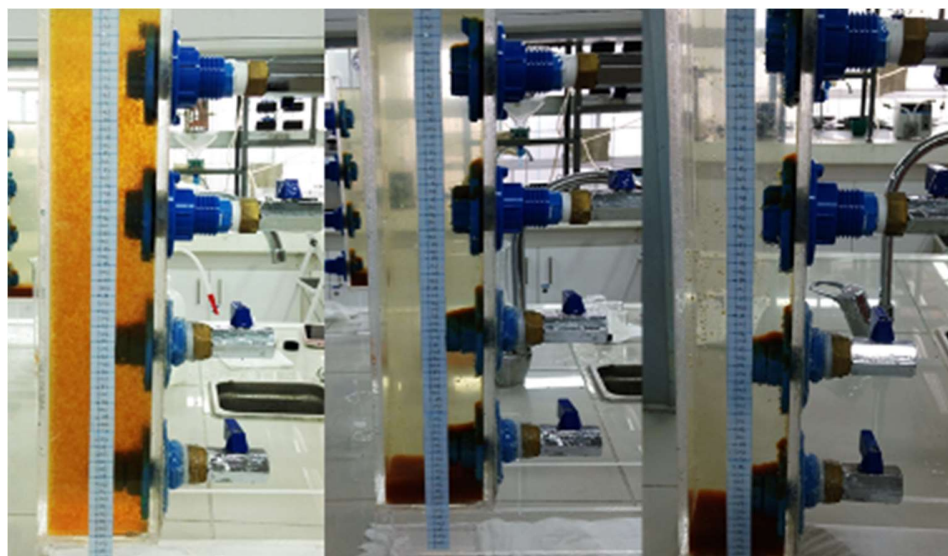

(a) 0 minutes

(b) 30 minutes

(c) 120 minutes

**Solution 2:  $\text{Al} = 100 \text{ mg L}^{-1}$ .  $\text{pH} = 5.5$**

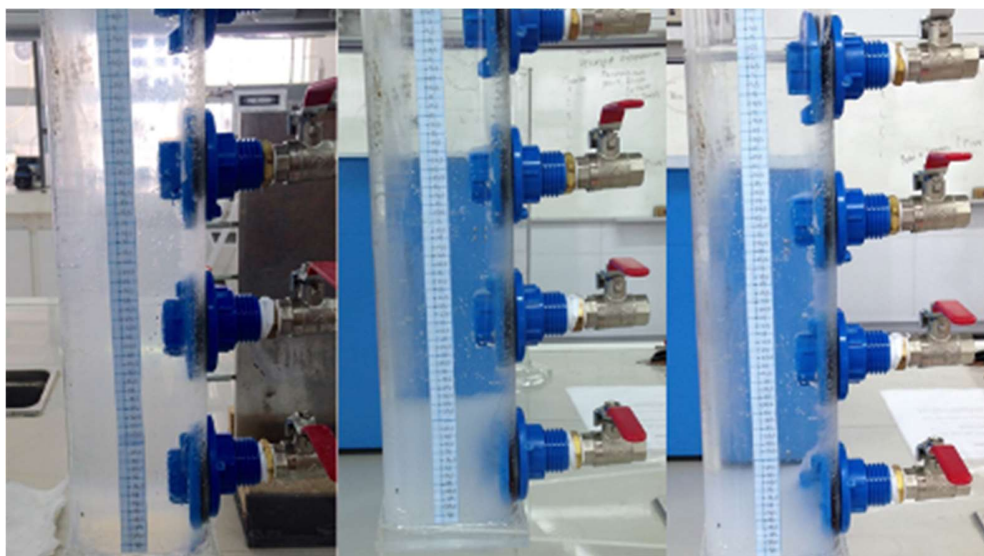

(a) 0 minutes

(b) 30 minutes

(c) 120 minutes

**Solution 3:  $\text{Al} = 100 \text{ mg L}^{-1} + \text{Fe} = 100 \text{ mg L}^{-1}$ .  $\text{pH} = 6.5$**

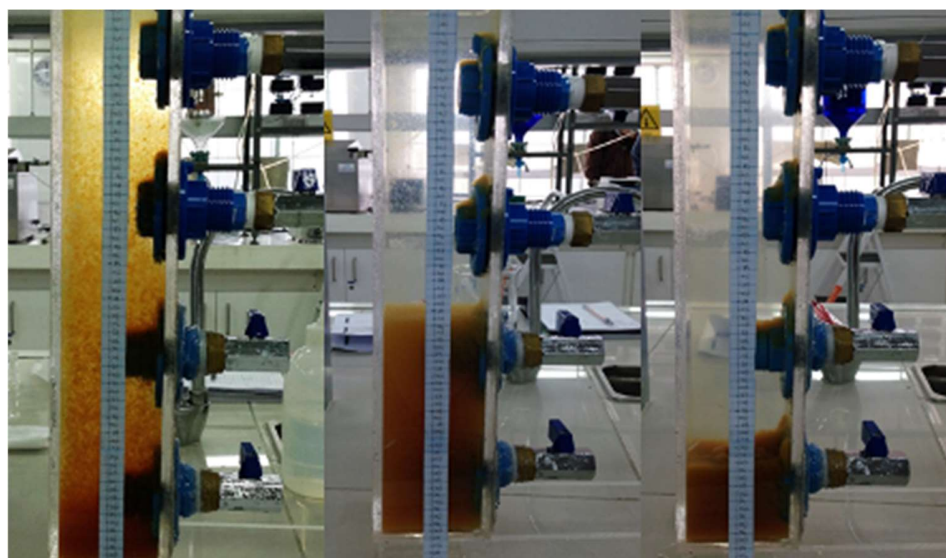

(a) 0 minutes

(b) 30 minutes

(c) 120 minutes

**Solution 4:  $\text{Fe} = 50 \text{ mg L}^{-1}$ .  $\text{pH} = 4.5$**

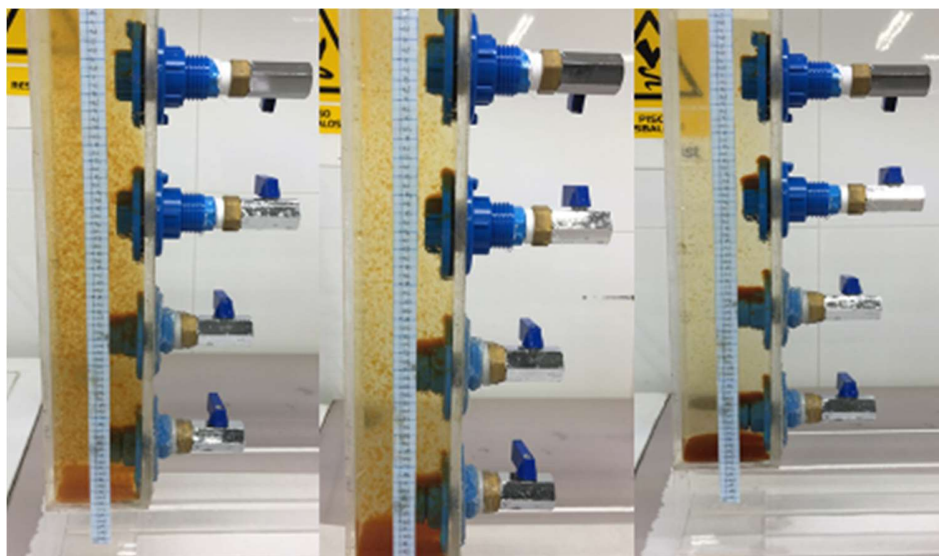

(a) 0 minutes

(b) 30 minutes

(c) 120 minutes

**Solution 5:  $\text{Al} = 50 \text{ mg L}^{-1}$ .  $\text{pH} = 4.5$**

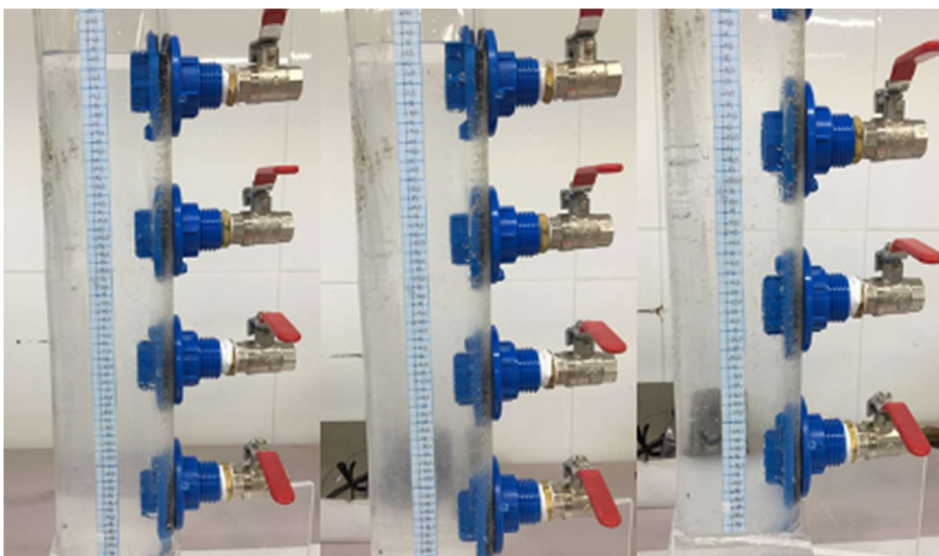

(a) 0 minutes

(b) 30 minutes

(c) 120 minutes

**Solution 6: Al = 50 mg L<sup>-1</sup> + Fe = 50 mg L<sup>-1</sup>. pH = 6.5**

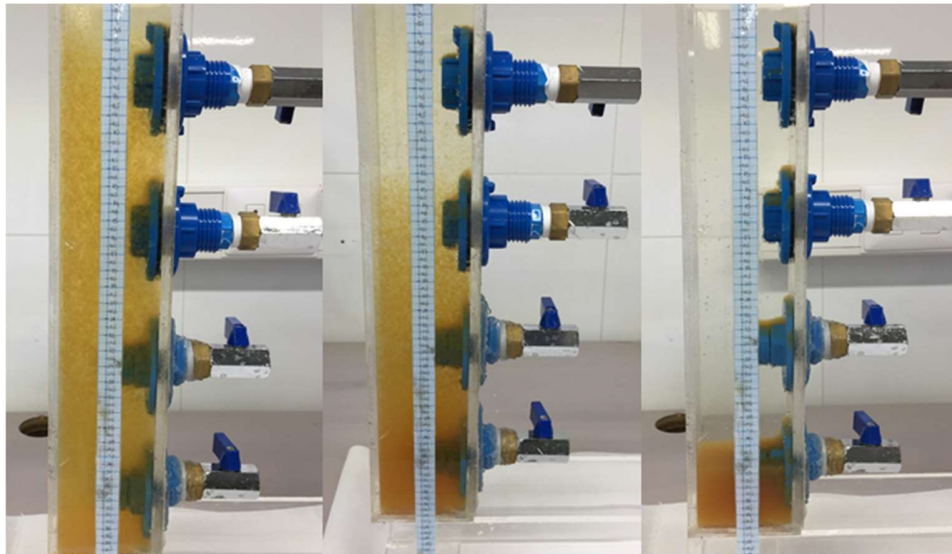

(a) 0 minutes

(b) 30 minutes

(c) 120 minutes

### Section S3. PHREEQC Code

#### PHASES

Schwermannite

$\text{Fe}_8\text{O}_8(\text{SO}_4)1.26(\text{OH})5.48 + 21.48\text{H}^+ = 8\text{Fe}^{+3} + 1.26\text{SO}_4^{-2} + 13.48\text{H}_2\text{O}$

log\_k 18.5

Hydrobasaluminnite

$\text{Al}_4\text{SO}_4(\text{OH})_{10}(\text{H}_2\text{O})_{15} + 10\text{H}^+ = 4\text{Al}^{+3} + \text{SO}_4^{-2} + 25\text{H}_2\text{O}$

log\_k 23.9

$\text{Fe}(\text{OH})_3(\text{a})$

$\text{Fe}(\text{OH})_3 + 3\text{H}^+ = \text{Fe}^{+3} + 3\text{H}_2\text{O}$

log\_k 3.0

$\text{Al}(\text{OH})_3$

$\text{Al}^{+3} + 3\text{H}_2\text{O} = \text{Al}(\text{OH})_3 + 3\text{H}^+$

log\_k -16.9

#### SOLUTION 1 Solution base

#Composition can be changed according to values in Table 1

temp 20

pH 1.3 charge

pe 5

redox pe

units g/l

density 1

Cl 2.504

Fe(3) 0.1

Al 0.1

Na 1.500

S(6) 2.422  
-water 1 # kg

SOLUTION 2  
temp 20  
pH 7 charge  
pe 4  
redox pe  
units mol/l  
density 1.08  
Na 2  
-water 1 # kg

EQUILIBRIUM\_PHASES 1  
CO2(g) -3.5  
O2(g) -0.679  
Schwermannite 0 0  
Fe(OH)3(a) 0 0  
Hydrobasaluminnite 0 0  
Al(OH)3 0 0

SELECTED\_OUTPUT 1  
-reset false  
-pH true  
-pe true  
-ionic\_strength true  
-totals Al Cl Fe Na S(6)  
-equilibrium\_phases Schwermannite Fe(OH)3(a) Hydrobasaluminnite Al(OH)3

END

#USE SOLUTION 1  
#USE SOLUTION 2  
MIX  
1 0.999  
2 0.001

END

#USE SOLUTION 1  
#USE SOLUTION 2  
MIX  
1 0.998  
2 0.002

USE EQUILIBRIUM\_PHASES 1

END

#USE SOLUTION 1  
#USE SOLUTION 2  
MIX  
1 0.997  
2 0.003

USE EQUILIBRIUM\_PHASES 1

END

#USE SOLUTION 1

#USE SOLUTION 2

MIX

1 0.996

2 0.004

USE EQUILIBRIUM\_PHASES 1

END

#USE SOLUTION 1

#USE SOLUTION 2

MIX

1 0.995

2 0.005

USE EQUILIBRIUM\_PHASES 1

END

#USE SOLUTION 1

#USE SOLUTION 2

MIX

1 0.994

2 0.006

END

## Section S4. Settling tests - raw data

### Solution type 1: Fe=100 mg L<sup>-1</sup>

#### pH = 4.5

| Time (min) | Height (cm) |
|------------|-------------|
| 0.0        | 35.0        |
| 2.5        | 34.5        |
| 5.0        | 14.0        |
| 10         | 3.6         |
| 15         | 2.8         |
| 20         | 2.2         |
| 30         | 2.0         |
| 40         | 1.8         |
| 50         | 1.7         |
| 60         | 1.6         |
| 70         | 1.6         |
| 80         | 1.6         |
| 90         | 1.5         |
| 120        | 1.5         |

| Time (min) | Height (cm) |
|------------|-------------|
| 0.0        | 35.0        |
| 2.5        | 34.5        |
| 5.0        | 31.7        |
| 10         | 4.5         |
| 15         | 3.1         |
| 20         | 2.7         |
| 30         | 2.1         |
| 40         | 2.0         |
| 50         | 2.0         |
| 60         | 1.9         |
| 70         | 1.8         |
| 80         | 1.7         |
| 90         | 1.6         |
| 120        | 1.6         |

#### pH = 5.5

| Time (min) | Height (cm) |
|------------|-------------|
| 0.0        | 35.0        |
| 2.5        | 34.5        |
| 5.0        | 14.6        |
| 10         | 3.5         |
| 15         | 2.3         |
| 20         | 2.0         |
| 30         | 1.9         |
| 40         | 1.8         |
| 50         | 1.7         |
| 60         | 1.7         |
| 70         | 1.7         |
| 80         | 1.7         |
| 90         | 1.7         |
| 120        | 1.7         |

| Time (min) | Height (cm) |
|------------|-------------|
| 0.0        | 35          |
| 2.5        | 34          |
| 5.0        | 14          |
| 10         | 3.6         |
| 15         | 3           |
| 20         | 2.6         |
| 30         | 2.6         |
| 40         | 2.3         |
| 50         | 2           |
| 60         | 2           |
| 70         | 2           |
| 80         | 2           |
| 90         | 2           |
| 120        | 2           |

#### pH = 6.5

| Time (min) | Height (cm) |
|------------|-------------|
| 0.0        | 35.0        |
| 2.5        | 33.0        |
| 5.0        | 22.0        |
| 10         | 3.7         |
| 15         | 3.0         |

| Time (min) | Height (cm) |
|------------|-------------|
| 0.0        | 35.0        |
| 2.5        | 34.0        |
| 5.0        | 28.0        |
| 10         | 3.0         |
| 15         | 2.4         |

| Time (min) | Height (cm) |
|------------|-------------|
| 20         | 2.5         |
| 30         | 2.2         |
| 40         | 2.0         |
| 50         | 2.0         |
| 60         | 2.0         |
| 70         | 2.0         |
| 80         | 2.0         |
| 90         | 2.0         |
| 120        | 2.0         |

| Time (min) | Height (cm) |
|------------|-------------|
| 20         | 2.1         |
| 30         | 2.0         |
| 40         | 1.8         |
| 50         | 1.8         |
| 60         | 1.8         |
| 70         | 1.8         |
| 80         | 1.8         |
| 90         | 1.8         |
| 120        | 1.8         |

## Solution type 2: Al = 100 mg L<sup>-1</sup>

pH = 4.5

| Time (min) | Height (cm) |
|------------|-------------|
| 0.0        | 40.0        |
| 2.5        | 39.9        |
| 5.0        | 38.4        |
| 10         | 34.0        |
| 15         | 6.4         |
| 20         | 6.0         |
| 30         | 6.0         |
| 40         | 5.5         |
| 50         | 5.5         |
| 60         | 5.5         |
| 70         | 5.5         |
| 80         | 5.5         |
| 90         | 5.5         |
| 120        | 5.5         |

| Time (min) | Height (cm) |
|------------|-------------|
| 0.0        | 40.0        |
| 2.5        | 39.5        |
| 5.0        | 38.5        |
| 10         | 35.0        |
| 15         | 6.2         |
| 20         | 6.0         |
| 30         | 5.8         |
| 40         | 5.6         |
| 50         | 5.6         |
| 60         | 5.6         |
| 70         | 5.6         |
| 80         | 5.6         |
| 90         | 5.6         |
| 120        | 5.6         |

pH = 5.5

| Time (min) | Height (cm) |
|------------|-------------|
| 0.0        | 40.0        |
| 2.5        | 38.5        |
| 5.0        | 34.5        |
| 10         | 25.0        |
| 15         | 18.9        |
| 20         | 13.7        |
| 30         | 11.7        |
| 40         | 11.0        |
| 50         | 9.5         |

| Time (min) | Height (cm) |
|------------|-------------|
| 0.0        | 40.0        |
| 2.5        | 39.0        |
| 5.0        | 35.0        |
| 10         | 27.0        |
| 15         | 23.2        |
| 20         | 20.1        |
| 30         | 13.1        |
| 40         | 11.7        |
| 50         | 11.0        |



| Time (min) | Height (cm) |
|------------|-------------|
| 60         | 9.2         |
| 70         | 9.2         |
| 80         | 9.2         |
| 90         | 9.0         |
| 120        | 8.5         |

| Time (min) | Height (cm) |
|------------|-------------|
| 60         | 10.5        |
| 70         | 10.2        |
| 80         | 9.8         |
| 90         | 9.8         |
| 120        | 9.3         |

pH = 6.5

| Time (min) | Height (cm) |
|------------|-------------|
| 0.0        | 40.0        |
| 2.5        | 39.0        |
| 5.0        | 35.0        |
| 10         | 27.0        |
| 15         | 20.5        |
| 20         | 14.0        |
| 30         | 12.0        |
| 40         | 10.8        |
| 50         | 10.1        |
| 60         | 9.6         |
| 70         | 9.5         |
| 80         | 9.5         |
| 90         | 9.0         |
| 120        | 9.0         |

| Time (min) | Height (cm) |
|------------|-------------|
| 0.0        | 40.0        |
| 2.5        | 39.5        |
| 5.0        | 36.0        |
| 10         | 28.0        |
| 15         | 21.5        |
| 20         | 19.4        |
| 30         | 12.5        |
| 40         | 11.0        |
| 50         | 10.7        |
| 60         | 10.3        |
| 70         | 10.0        |
| 80         | 9.6         |
| 90         | 9.5         |
| 120        | 8.7         |

**Solution type 3: Fe = 100 mg L<sup>-1</sup> + Al = 100 mg L<sup>-1</sup>**

pH = 4.5

| Time (min) | Height (cm) |
|------------|-------------|
| 0.0        | 35.0        |
| 2.5        | 34.5        |
| 5.0        | 23.0        |
| 10         | 9.0         |
| 15         | 6.8         |
| 20         | 5.8         |
| 30         | 4.5         |
| 40         | 3.5         |
| 50         | 3.1         |
| 60         | 3.0         |
| 70         | 2.9         |
| 80         | 2.9         |
| 90         | 2.9         |

| Time (min) | Height (cm) |
|------------|-------------|
| 0.0        | 35.0        |
| 2.5        | 34.5        |
| 5.0        | 31.0        |
| 10         | 6.5         |
| 15         | 5.0         |
| 20         | 4.3         |
| 30         | 3.5         |
| 40         | 2.7         |
| 50         | 2.5         |
| 60         | 2.4         |
| 70         | 2.3         |
| 80         | 2.3         |
| 90         | 2.3         |

| Time (min) | Height (cm) |
|------------|-------------|
| 120        | 2.9         |

| Time (min) | Height (cm) |
|------------|-------------|
| 120        | 2.0         |

pH = 5.5

| Time (min) | Height (cm) |
|------------|-------------|
| 0.0        | 35.0        |
| 2.5        | 34.0        |
| 5.0        | 31.5        |
| 10         | 22.5        |
| 15         | 16.0        |
| 20         | 12.8        |
| 30         | 9.7         |
| 40         | 7.9         |
| 50         | 7.8         |
| 60         | 7.5         |
| 70         | 6.9         |
| 80         | 6.6         |
| 90         | 5.5         |
| 120        | 5.5         |

| Time (min) | Height (cm) |
|------------|-------------|
| 0.0        | 35.0        |
| 2.5        | 34.2        |
| 5.0        | 31.5        |
| 10         | 24.3        |
| 15         | 17.1        |
| 20         | 14.5        |
| 30         | 10.4        |
| 40         | 8.7         |
| 50         | 8.0         |
| 60         | 7.7         |
| 70         | 7.3         |
| 80         | 6.8         |
| 90         | 6.3         |
| 120        | 6.3         |

pH = 6.5

| Time (min) | Height (cm) |
|------------|-------------|
| 0.0        | 35.0        |
| 2.5        | 33.6        |
| 5.0        | 31.0        |
| 10         | 25.3        |
| 15         | 18.4        |
| 20         | 16.0        |
| 30         | 11.7        |
| 40         | 9.4         |
| 50         | 8.9         |
| 60         | 5.7         |
| 70         | 5.7         |
| 80         | 5.7         |
| 90         | 5.7         |
| 120        | 5.7         |

| Time (min) | Height (cm) |
|------------|-------------|
| 0.0        | 35.0        |
| 2.5        | 34.0        |
| 5.0        | 32.0        |
| 10         | 25.1        |
| 15         | 18.5        |
| 20         | 15.6        |
| 30         | 11.5        |
| 40         | 9.2         |
| 50         | 8.7         |
| 60         | 8.2         |
| 70         | 7.8         |
| 80         | 7.4         |
| 90         | 7.0         |
| 120        | 6.2         |

#### Solution type 4: Fe = 50 mg L<sup>-1</sup>

pH = 4.5

| Time (min) | Height (cm) |
|------------|-------------|
| 0.0        | 35.0        |
| 2.5        | 34.7        |
| 5.0        | 32.0        |
| 10         | 1.3         |
| 15         | 1.3         |
| 20         | 1.2         |
| 30         | 1.1         |
| 40         | 1.1         |
| 50         | 1.1         |
| 60         | 1.1         |
| 70         | 1.1         |
| 80         | 1.1         |
| 90         | 1.1         |
| 120        | 1.1         |

| Time (min) | Height (cm) |
|------------|-------------|
| 0.0        | 35.0        |
| 2.5        | 34.7        |
| 5.0        | 32.5        |
| 10         | 1.3         |
| 15         | 1.3         |
| 20         | 1.3         |
| 30         | 1.3         |
| 40         | 1.2         |
| 50         | 1.2         |
| 60         | 1.1         |
| 70         | 1.1         |
| 80         | 1.1         |
| 90         | 1.1         |
| 120        | 1.1         |

pH = 5.5

| Time (min) | Height (cm) |
|------------|-------------|
| 0.0        | 35.0        |
| 2.5        | 34.7        |
| 5.0        | 31.5        |
| 10         | 1.5         |
| 15         | 1.3         |
| 20         | 1.2         |
| 30         | 1.2         |
| 40         | 1.2         |
| 50         | 1.2         |
| 60         | 1.2         |
| 70         | 1.2         |
| 80         | 1.2         |
| 90         | 1.2         |
| 120        | 1.2         |

| Time (min) | Height (cm) |
|------------|-------------|
| 0.0        | 35.0        |
| 2.5        | 34.5        |
| 5.0        | 31.0        |
| 10         | 1.2         |
| 15         | 1.2         |
| 20         | 1.2         |
| 30         | 1.2         |
| 40         | 1.2         |
| 50         | 1.2         |
| 60         | 1.2         |
| 70         | 1.2         |
| 80         | 1.2         |
| 90         | 1.2         |
| 120        | 1.2         |

pH = 6.5

| Time (min) | Height (cm) |
|------------|-------------|
| 0.0        | 35.0        |
| 2.5        | 34.5        |

| Time (min) | Height (cm) |
|------------|-------------|
| 0.0        | 35.0        |
| 2.5        | 34.5        |

| Time (min) | Height (cm) |
|------------|-------------|
| 5.0        | 28.0        |
| 10         | 1.2         |
| 15         | 1.2         |
| 20         | 1.2         |
| 30         | 1.1         |
| 40         | 1.1         |
| 50         | 1.1         |
| 60         | 1.1         |
| 70         | 1.1         |
| 80         | 1.1         |
| 90         | 1.1         |
| 120        | 1.1         |

| Time (min) | Height (cm) |
|------------|-------------|
| 5.0        | 29.0        |
| 10         | 1.0         |
| 15         | 1.0         |
| 20         | 1.0         |
| 30         | 1.0         |
| 40         | 1.0         |
| 50         | 1.0         |
| 60         | 1.0         |
| 70         | 1.0         |
| 80         | 1.0         |
| 90         | 1.0         |
| 120        | 1.0         |

### Solution type 5: Al = 50 mg L<sup>-1</sup>

pH = 4.5

| Time (min) | Height (cm) |
|------------|-------------|
| 0.0        | 40.0        |
| 2.5        | 39.5        |
| 5.0        | 39.0        |
| 10         | 6.5         |
| 15         | 6.3         |
| 20         | 6.0         |
| 30         | 5.7         |
| 40         | 5.5         |
| 50         | 5.5         |
| 60         | 5.5         |
| 70         | 5.5         |
| 80         | 5.5         |
| 90         | 5.5         |
| 120        | 5.5         |

| Time (min) | Height (cm) |
|------------|-------------|
| 0.0        | 40.0        |
| 2.5        | 39.5        |
| 5.0        | 39.0        |
| 10         | 9.5         |
| 15         | 7.6         |
| 20         | 7.2         |
| 30         | 6.7         |
| 40         | 6.4         |
| 50         | 6.2         |
| 60         | 6.2         |
| 70         | 6.2         |
| 80         | 6.2         |
| 90         | 6.0         |
| 120        | 6.0         |

pH = 5.5

| Time (min) | Height (cm) |
|------------|-------------|
| 0.0        | 40.0        |
| 2.5        | 39.0        |
| 5.0        | 34.5        |
| 10         | 9.1         |
| 15         | 8.3         |
| 20         | 7.7         |

| Time (min) | Height (cm) |
|------------|-------------|
| 0.0        | 40.0        |
| 2.5        | 39.5        |
| 5.0        | 36.0        |
| 10         | 11.5        |
| 15         | 9.6         |
| 20         | 8.8         |

| Time (min) | Height (cm) |
|------------|-------------|
| 30         | 7.2         |
| 40         | 7.0         |
| 50         | 6.8         |
| 60         | 6.7         |
| 70         | 6.7         |
| 80         | 6.7         |
| 90         | 6.7         |
| 120        | 6.7         |

| Time (min) | Height (cm) |
|------------|-------------|
| 30         | 8.0         |
| 40         | 7.5         |
| 50         | 7.3         |
| 60         | 7.1         |
| 70         | 7.0         |
| 80         | 7.0         |
| 90         | 7.0         |
| 120        | 7.0         |

pH = 6.5

| Time (min) | Height (cm) |
|------------|-------------|
| 0.0        | 40.0        |
| 2.5        | 38.5        |
| 5.0        | 37.0        |
| 10         | 14.0        |
| 15         | 8.5         |
| 20         | 7.9         |
| 30         | 7.8         |
| 40         | 7.0         |
| 50         | 6.8         |
| 60         | 6.8         |
| 70         | 6.7         |
| 80         | 6.5         |
| 90         | 6.5         |
| 120        | 6.5         |

| Time (min) | Height (cm) |
|------------|-------------|
| 0.0        | 40.0        |
| 2.5        | 39.0        |
| 5.0        | 36.5        |
| 10         | 8.5         |
| 15         | 7.6         |
| 20         | 7.3         |
| 30         | 7.0         |
| 40         | 6.7         |
| 50         | 6.6         |
| 60         | 6.5         |
| 70         | 6.5         |
| 80         | 6.5         |
| 90         | 6.5         |
| 120        | 6.5         |

**Solution type 6: Fe = 50 mg L<sup>-1</sup> + Al = 50 mg L<sup>-1</sup>**

pH = 4.5

| Time (min) | Height (cm) |
|------------|-------------|
| 0.0        | 35.0        |
| 2.5        | 32.0        |
| 5.0        | 25.0        |
| 10         | 6.2         |
| 15         | 5.1         |
| 20         | 4.3         |
| 30         | 3.3         |
| 40         | 2.7         |
| 50         | 2.6         |
| 60         | 2.5         |

| Time (min) | Height (cm) |
|------------|-------------|
| 0.0        | 35.0        |
| 2.5        | 34.0        |
| 5.0        | 30.5        |
| 10         | 5.6         |
| 15         | 4.2         |
| 20         | 3.5         |
| 30         | 2.8         |
| 40         | 2.4         |
| 50         | 2.2         |
| 60         | 2.1         |

| Time (min) | Height (cm) |
|------------|-------------|
| 70         | 2.4         |
| 80         | 2.3         |
| 90         | 2.3         |
| 120        | 2.2         |

| Time (min) | Height (cm) |
|------------|-------------|
| 70         | 2.1         |
| 80         | 2.0         |
| 90         | 2.0         |
| 120        | 2.0         |

pH = 5.5

| Time (min) | Height (cm) |
|------------|-------------|
| 0.0        | 35.0        |
| 2.5        | 34.0        |
| 5.0        | 28.5        |
| 10         | 8.5         |
| 15         | 5.4         |
| 20         | 1.3*        |
| 30         | 4.2         |
| 40         | 3.5         |
| 50         | 3.2         |
| 60         | 3.0         |
| 70         | 2.9         |
| 80         | 2.8         |
| 90         | 2.8         |
| 120        | 2.8         |

| Time (min) | Height (cm) |
|------------|-------------|
| 0.0        | 35.0        |
| 2.5        | 34.5        |
| 5.0        | 29.0        |
| 10         | 13.5        |
| 15         | 8.2         |
| 20         | 6.8*        |
| 30         | 5.7         |
| 40         | 4.5         |
| 50         | 4.1         |
| 60         | 3.9         |
| 70         | 3.5         |
| 80         | 3.5         |
| 90         | 3.5         |
| 120        | 3.5         |

\*These measurements are not presented in the graphs.

pH = 6.5

| Time (min) | Height (cm) |
|------------|-------------|
| 0.0        | 35.0        |
| 2.5        | 34.0        |
| 5.0        | 30.0        |
| 10         | 7.0         |
| 15         | 5.6         |
| 20         | 4.7         |
| 30         | 3.9         |
| 40         | 3.4         |
| 50         | 3.1         |
| 60         | 3.0         |
| 70         | 3.0         |
| 80         | 2.8         |
| 90         | 2.7         |
| 120        | 2.7         |

| Time (min) | Height (cm) |
|------------|-------------|
| 0.0        | 35.0        |
| 2.5        | 33.5        |
| 5.0        | 29.5        |
| 10         | 10.0        |
| 15         | 6.9         |
| 20         | 6.0         |
| 30         | 4.9         |
| 40         | 3.9         |
| 50         | 3.6         |
| 60         | 3.4         |
| 70         | 3.3         |
| 80         | 3.2         |
| 90         | 3.2         |
| 120        | 3.2         |

### Summary of calculated settling velocity

| Solution        | Vs (mm/s) |      |          |      |          |      |
|-----------------|-----------|------|----------|------|----------|------|
|                 | pH = 4.5  |      | pH = 5.5 |      | pH = 6.5 |      |
|                 | R1        | R2   | R1       | R2   | R1       | R2   |
| Al 50           | 1.61      | 1.43 | 1.16     | 1.11 | 1.04     | 1.32 |
| Al 100          | 1.39      | 1.31 | 0.34     | 0.32 | 0.32     | 0.29 |
| Fe 50           | 1.47      | 1.50 | 1.42     | 1.41 | 1.22     | 1.29 |
| Fe 100          | 1.89      | 1.27 | 1.83     | 1.83 | 0.90     | 1.13 |
| Fe 50 + Al 50   | 0.82      | 1.14 | 0.85     | 0.61 | 1.04     | 0.84 |
| Fe 100 + Al 100 | 1.12      | 1.01 | 0.34     | 0.28 | 0.27     | 0.25 |

### Section S5. Results of PHREEQC simulations

*See Excel spreadsheet.*

### Section S6. Zeta potential data

| pH  | Zeta potential (mV) |       |           |        |                          |        |
|-----|---------------------|-------|-----------|--------|--------------------------|--------|
|     | 50 mgFe/L           |       | 50 mgAl/L |        | 50 mgFe/L +<br>50 mgAl/L |        |
|     | R1                  | R2    | R1        | R2     | R1                       | R2     |
| 4.5 | -2.98               | -2.64 | -5.9      | -5.78  | -6.1                     | -5.7   |
| 5.5 | -3.3                | -3.12 | -9.26     | -9.13  | -7.34                    | -7.81  |
| 6.5 | -5.46               | -5.71 | -13.54    | -14.01 | -12.45                   | -13.01 |
| 7.5 | -5.57               | -6.4  | -16.89    | -17.12 | -15.21                   | -15.73 |
| 8.5 | -9.97               | -10.2 | -21.88    | -20.56 | -16.29                   | -16.95 |
